# Supplementary material
Source: PubMed Central journal article supplement (PMC7236753)
Supplement: mmc1.pdf [file mmc1.pdf]

## Online Supplement – Appendix: Proofs

**Proof for Lemma 1:** We calculate the determinant of the Hessian of the R's profit  $\Pi_R(p_1, p_2; w_1, w_2) = (p_1 - w_1)(\alpha_1 - \beta_1 p_1 + p_2) + (p_2 - w_2)(\alpha_2 + p_1 - \beta_2 p_2)$  as:

$$\begin{aligned} |H\Pi_R(p_1, p_2; w_1, w_2)| &= \begin{vmatrix} \frac{\partial^2 \Pi_R(p_1, p_2; w_1, w_2)}{\partial p_1^2} & \frac{\partial^2 \Pi_R(p_1, p_2; w_1, w_2)}{\partial p_1 \partial p_2} \\ \frac{\partial^2 \Pi_R(p_1, p_2; w_1, w_2)}{\partial p_2 \partial p_1} & \frac{\partial^2 \Pi_R(p_1, p_2; w_1, w_2)}{\partial p_2^2} \end{vmatrix}, \\ &= \frac{\partial^2 \Pi_R(p_1, p_2; w_1, w_2)}{\partial p_1^2} \frac{\partial^2 \Pi_R(p_1, p_2; w_1, w_2)}{\partial p_2^2} - \frac{\partial^2 \Pi_R(p_1, p_2; w_1, w_2)}{\partial p_1 \partial p_2} \frac{\partial^2 \Pi_R(p_1, p_2; w_1, w_2)}{\partial p_2 \partial p_1}. \end{aligned}$$

We calculate the derivatives and then the determinant as follows:

$$\begin{aligned} \frac{\partial^2 \Pi_R(p_1, p_2; w_1, w_2)}{\partial p_1^2} &= -2\beta_1, \quad \frac{\partial^2 \Pi_R(p_1, p_2; w_1, w_2)}{\partial p_1 \partial p_2} = 2, \\ \frac{\partial^2 \Pi_R(p_1, p_2; w_1, w_2)}{\partial p_2^2} &= -2\beta_2, \quad \frac{\partial^2 \Pi_R(p_1, p_2; w_1, w_2)}{\partial p_2 \partial p_1} = 2, \\ \det(H\Pi_R(p_1, p_2; w_1, w_2)) &= 4\beta_1\beta_2 - 4 = 4(\beta_1\beta_2 - 1). \end{aligned}$$

Since,  $\frac{\partial^2 \Pi_R(p_1, p_2; w_1, w_2)}{\partial p_1^2} < 0$ , when  $\beta_1\beta_2 - 1 \geq 0$  the critical point obtained by solving  $\frac{\partial \Pi_R(p_1, p_2; w_1, w_2)}{\partial p_1} = 0$  and  $\frac{\partial \Pi_R(p_1, p_2; w_1, w_2)}{\partial p_2} = 0$  will be the local maximum of the profit, i.e.,  $\Pi_R(p_1, p_2; w_1, w_2)$  is concave in  $(p_1, p_2)$ . A sufficient condition to preserve concavity is to assume  $\beta_i \geq 0 \implies \beta_1\beta_2 \geq 1$ , for  $i \in \{1, 2\}$ .  $\square$

**Proof for Lemma 2:** From (2), we have:  $p_i^*(w_i) = \frac{\alpha_i\beta_{-i} + \alpha_{-i}}{2(\beta_i\beta_{-i} - 1)} + \frac{w_i}{2}$ . The first order derivatives, w.r.t.  $w_i$ ,  $\alpha_i$ ,  $\alpha_{-i}$ ,  $\beta_i$ , and  $\beta_{-i}$  are:

$$\begin{aligned} \frac{\partial p_i^*(w_i)}{w_i} &= \frac{1}{2} > 0, \\ \frac{\partial p_i^*(w_i)}{\alpha_i} &= \frac{\beta_{-i}}{2(\beta_i\beta_{-i} - 1)} > 0, \quad \frac{\partial p_i^*(w_i)}{\alpha_{-i}} = \frac{1}{2(\beta_i\beta_{-i} - 1)} > 0 \quad \text{and} \quad \frac{\partial p_i^*(w_i)}{\alpha_i} = \beta_{-i} \frac{\partial p_i^*(w_i)}{\alpha_{-i}} \geq \frac{\partial p_i^*(w_i)}{\alpha_{-i}}, \\ \frac{\partial p_i^*(w_i)}{\beta_i} &= -\frac{\alpha_i\beta_{-i}^2}{2(\beta_i\beta_{-i} - 1)^2} < 0, \\ \frac{\partial p_i^*(w_i)}{\beta_{-i}} &= \frac{\alpha_i(\beta_i\beta_{-i} - 1) - \beta_i(\alpha_i\beta_{-i} + \alpha_{-i})}{2(\beta_i\beta_{-i} - 1)^2} = -\frac{\alpha_i + \beta_i\alpha_{-i}}{2(\beta_i\beta_{-i} - 1)^2} < 0. \end{aligned}$$

From the above first order conditions to be positive or negative, we see that  $p_i^*(w_i)$  is increasing in the wholesale price  $w_i$ , market sizes  $(\alpha_1, \alpha_2)$ , and decreasing in product's own price elasticity  $\beta_i$  and other product's price elasticity  $\beta_{-i}$ .  $\square$

**Proof for Lemma 3:** Supplier A's profit is given by:  $\Pi_A(w_1, w_2) = (w_1 - c_1)D_1(p_1^*(w_1), p_2^*(w_2)) = (w_1 - c_1)(\alpha_1 - \beta_1 p_1^*(w_1) + p_2^*(w_2))$ . In order to examine the concavity of  $\Pi_A(w_1, w_2)$  in  $w_1$  and  $w_2$ , we derive the second order derivatives with respect to  $w_i$  as:

$$\frac{\partial^2 \Pi_A(w_1, w_2)}{\partial w_1^2} = -\frac{\beta_1}{2} < 0, \quad \frac{\partial \Pi_A(w_1, w_2)}{\partial w_2} = \frac{(w_1 - c_1)}{2} \geq 0, \quad \text{and} \quad \frac{\partial^2 \Pi_A(w_1, w_2)}{\partial w_2^2} = 0.$$

Since, the second order derivative of supplier A's profit w.r.t.  $w_1$  is negative, the profit is concave in  $w_1$ . Furthermore, we see that the first order derivative of the profit w.r.t.  $w_2$  is independent of  $w_2$  and

non-negative; also, the second order derivative is zero. This implies that the profit is linearly increasing in  $w_2$ . We can derive similar expressions for supplier B.  $\square$

**Proof for Proposition 1:**

i) Consider the first order derivative of  $w_1^e$  (from (3)) w.r.t.  $\beta_1$  and  $\beta_2$  as:

$$\begin{aligned}\frac{\partial w_1^e}{\partial \beta_1} &= \frac{2\beta_2 c_1(4\beta_1\beta_2 - 1) - 4\beta_2[\alpha_2 + \beta_2(2(\alpha_1 + \beta_1 c_1) + c_2)]}{(4\beta_1\beta_2 - 1)^2} = -\frac{2\beta_2 c_1 + 4\beta_2[\alpha_2 + \beta_2(2\alpha_1 + c_2)]}{(4\beta_1\beta_2 - 1)^2} < 0, \\ &= -\frac{[2\beta_2(2\alpha_2 + c_1) + 4\beta_2^2(2\alpha_1 + c_2)]}{(4\beta_1\beta_2 - 1)^2}, \\ \frac{\partial w_1^e}{\partial \beta_2} &= \frac{[2(\alpha_1 + \beta_1 c_1) + c_2](4\beta_1\beta_2 - 1) - 4\beta_1[\alpha_2 + \beta_2(2(\alpha_1 + \beta_1 c_1) + c_2)]}{(4\beta_1\beta_2 - 1)^2} < 0, \\ &= -\frac{[(2\alpha_1 + c_2) + 2\beta_1(2\alpha_2 + c_1)]}{(4\beta_1\beta_2 - 1)^2} > -\frac{[2\beta_2(2\alpha_2 + c_1) + 4\beta_2^2(2\alpha_1 + c_2)]}{(4\beta_1\beta_2 - 1)^2} = \frac{\partial w_1^e}{\partial \beta_1} \text{ if } \beta_2 > \beta_1.\end{aligned}$$

Since,  $w_1^e$  and  $w_2^e$  are symmetric, we present the first order derivatives for only  $w_1^e$  w.r.t.  $\beta_1$  and  $\beta_2$ . Checking the sensitivity of  $p_1^e$  w.r.t.  $\beta_1$  and  $\beta_2$ :

$$\begin{aligned}p_1^e &= \frac{\alpha_1\beta_2 + \alpha_2}{2(\beta_1\beta_2 - 1)} + \frac{w_1^e}{2}, \\ \frac{\partial p_1^e}{\partial \beta_1} &= \frac{0 - \beta_2[\alpha_1\beta_2 + \alpha_2]}{2(\beta_1\beta_2 - 1)^2} + \frac{1}{2} \frac{\partial w_1^e}{\partial \beta_1} < 0, \text{ as } \frac{\partial w_1^e}{\partial \beta_1} < 0, \\ \frac{\partial p_1^e}{\partial \beta_2} &= \frac{\alpha_1[\beta_1\beta_2 - 1] - \beta_1[\alpha_1\beta_2 + \alpha_2]}{2(\beta_1\beta_2 - 1)^2} + \frac{1}{2} \frac{\partial w_1^e}{\partial \beta_2} = -\frac{\alpha_1 + \beta_1\alpha_2}{2(\beta_1\beta_2 - 1)^2} + \frac{1}{2} \frac{\partial w_1^e}{\partial \beta_2} < 0, \text{ as } \frac{\partial w_1^e}{\partial \beta_2} < 0.\end{aligned}$$

ii) We look at the difference of  $w_i^e - w_{-i}^e$ :

$$\begin{aligned}w_i^e - w_{-i}^e &= \frac{[\alpha_{-i} + \beta_{-i}(2(\alpha_i + \beta_i c_i) + c_{-i})] - [\alpha_i + \beta_i(2(\alpha_{-i} + \beta_{-i} c_{-i}) + c_i)]}{4\beta_1\beta_2 - 1}, \\ \implies (w_i^e - w_{-i}^e)(4\beta_1\beta_2 - 1) &= (\alpha_i - \beta_i c_i)(2\beta_{-i} - 1) - (\alpha_{-i} - \beta_{-i} c_{-i})(2\beta_i - 1) \\ \implies \frac{(w_i^e - w_{-i}^e)(4\beta_1\beta_2 - 1)}{(2\beta_i - 1)(2\beta_{-i} - 1)} &= \frac{\alpha_i - \beta_i c_i}{2\beta_i - 1} - \frac{\alpha_{-i} - \beta_{-i} c_{-i}}{2\beta_{-i} - 1}, \\ \implies w_i^e \geq w_{-i}^e &\text{ if } \frac{\alpha_i - \beta_i c_i}{2\beta_i - 1} \geq \frac{\alpha_{-i} - \beta_{-i} c_{-i}}{2\beta_{-i} - 1}.\end{aligned}$$

Therefore, if the market parameters for products 1 and 2 satisfy the above condition, then  $w_i^e \geq w_{-i}^e$ .

Next, we consider the difference of  $p_i^e - p_{-i}^e$ :

$$\begin{aligned}p_i^e - p_{-i}^e &= \frac{\alpha_i\beta_{-i} + \alpha_{-i} - \alpha_{-i}\beta_i - \alpha_i}{2(\beta_1\beta_2 - 1)} + \frac{w_i^e - w_{-i}^e}{2}, \\ &= \frac{\alpha_i(\beta_{-i} - 1) - \alpha_{-i}(\beta_i - 1)}{2(\beta_1\beta_2 - 1)} + \frac{w_i^e - w_{-i}^e}{2}, \\ \implies p_i^e \geq p_{-i}^e &\text{ if } \frac{\alpha_i}{\beta_i - 1} \geq \frac{\alpha_{-i}}{\beta_{-i} - 1} \text{ and } w_i^e \geq w_{-i}^e.\end{aligned}$$

We know that if  $\frac{\alpha_i - \beta_i c_i}{2\beta_i - 1} \geq \frac{\alpha_{-i} - \beta_{-i} c_{-i}}{2\beta_{-i} - 1}$ , then  $w_i^e \geq w_{-i}^e$ . Combining with the above results, we have:

$$p_i^e \geq p_{-i}^e \text{ if } \frac{\alpha_i}{\beta_i - 1} \geq \frac{\alpha_{-i}}{\beta_{-i} - 1} \text{ and } \frac{\alpha_i - \beta_i c_i}{2\beta_i - 1} \geq \frac{\alpha_{-i} - \beta_{-i} c_{-i}}{2\beta_{-i} - 1}. \quad \square$$

**Proof for Theorem 1:** i) We first analyze the Stackelberg game where A leads, from (3) and (6), we have

$$\begin{aligned}
w_{1,s_A}^e - w_{1,n}^e &= \frac{\alpha_2 + 2\alpha_1\beta_2 + \beta_2c_2}{2(2\beta_1\beta_2 - 1)} + \frac{c_1}{2} - \frac{\alpha_2 + 2\alpha_1\beta_2 + \beta_2c_2 + 2\beta_1\beta_2c_1}{4\beta_1\beta_2 - 1}, \\
&= \frac{\alpha_2 + 2\alpha_1\beta_2 + \beta_2c_2}{2(2\beta_1\beta_2 - 1)(4\beta_1\beta_2 - 1)} + \frac{c_1}{2} - \frac{1}{2} \frac{4\beta_1\beta_2c_1 - c_1 + c_1}{4\beta_1\beta_2 - 1}, \\
&= \frac{1}{4\beta_1\beta_2 - 1} \left( \frac{\alpha_2 + 2\alpha_1\beta_2 + \beta_2c_2}{2(2\beta_1\beta_2 - 1)} - \frac{c_1}{2} \right) = \frac{1}{4\beta_1\beta_2 - 1} (w_{1,s_A}^e - c_1) > 0.
\end{aligned}$$

As  $w_{2,s_A}^e = \frac{\alpha_2 + w_{1,s_A}^e}{2\beta_2} + \frac{c_2}{2}$  and  $w_{2,n}^e = \frac{\alpha_2 + w_{1,n}^e}{2\beta_2} + \frac{c_2}{2}$ , it is easy to obtain that  $w_{2,s_A}^e > w_{2,n}^e$  by using  $w_{1,s_A}^e > w_{1,n}^e$ . Similarly, we can prove that  $p_{i,s_A}^e > p_{i,n}^e$  using (2).

We now use the ‘‘similarity’’ between the Stackelberg games to present the expressions for the case where B leads the SC.

$$w_{2,s_B}^e - w_{2,n}^e = \frac{1}{4\beta_1\beta_2 - 1} (w_{2,s_B}^e - c_2) > 0, \text{ and } w_{1,s_B}^e - w_{1,n}^e = \frac{1}{2\beta_1} (w_{2,s_B}^e - w_{2,n}^e) > 0.$$

ii) Again, we first analyze the Stackelberg game where A leads. We know that  $D_{1,s}^e = \alpha_1 - \beta_1 p_{1,s}^e + p_{2,s}^e$  and  $D_{1,n}^e = \alpha_1 - \beta_1 p_{1,n}^e + p_{2,n}^e$ :

$$\begin{aligned}
D_{1,s_A}^e - D_{1,n}^e &= p_{2,s_A}^e - p_{2,n}^e - \beta_1(p_{1,s_A}^e - p_{1,n}^e) = \frac{w_{2,s_A}^e - w_{2,n}^e}{2} - \frac{\beta_1}{2}(w_{1,s_A}^e - w_{1,n}^e), \\
&= \frac{1}{2\beta_2} \left( \frac{w_{1,s_A}^e - w_{1,n}^e}{2} \right) - \frac{\beta_1}{2}(w_{1,s_A}^e - w_{1,n}^e) = -\frac{2\beta_1\beta_2 - 1}{2\beta_2} \left( \frac{w_{1,s_A}^e - w_{1,n}^e}{2} \right) < 0 \text{ as } w_{1,s_A}^e > w_{1,n}^e.
\end{aligned}$$

Similar to the above, we consider:

$$\begin{aligned}
D_{2,s_A}^e - D_{2,n}^e &= p_{1,s_A}^e - p_{1,n}^e - \beta_2(p_{2,s_A}^e - p_{2,n}^e) = \frac{w_{1,s_A}^e - w_{1,n}^e}{2} - \frac{\beta_2}{2}(w_{2,s_A}^e - w_{2,n}^e), \\
&= \frac{w_{1,s_A}^e - w_{1,n}^e}{2} - \frac{\beta_2}{2} \left( \frac{1}{\beta_2} \frac{w_{1,s_A}^e - w_{1,n}^e}{2} \right) = \frac{1}{2} \left( \frac{w_{1,s_A}^e - w_{1,n}^e}{2} \right) > 0 \text{ as } w_{1,s_A}^e > w_{1,n}^e.
\end{aligned}$$

When B leads the SC, we have:

$$D_{2,s_B}^e - D_{2,n}^e = -\frac{2\beta_1\beta_2 - 1}{4\beta_1} (w_{2,s_B}^e - w_{2,n}^e) < 0, \text{ and } D_{1,s_B}^e - D_{1,n}^e = \frac{1}{4} (w_{2,s_B}^e - w_{2,n}^e) > 0.$$

Therefore, we have  $D_{1,s_B}^e > D_{2,n}^e > D_{2,s_A}^e$  and  $D_{2,s_B}^e < D_{2,n}^e < D_{2,s_A}^e$ .

iii) Considering  $\Pi_{R,n}^*(w_1, w_2) = \max_{(p_1, p_2)} (p_1 - w_1)(\alpha_1 - \beta_1 p_1 + p_2) + (p_2 - w_2)(\alpha_2 - \beta_2 p_2 + p_1)$ , and (2), we have:

$$\begin{aligned}
\Pi_{R,n}^*(w_1, w_2) &= \left( \frac{\alpha_1\beta_2 + \alpha_2}{2(\beta_1\beta_2 - 1)} - \frac{w_1}{2} \right) \left( \alpha_1 - \beta_1 \left[ \frac{\alpha_1\beta_2 + \alpha_2}{2(\beta_1\beta_2 - 1)} + \frac{w_1}{2} \right] + \frac{\alpha_2\beta_1 + \alpha_1}{2(\beta_1\beta_2 - 1)} + \frac{w_2}{2} \right) \\
&\quad + \left( \frac{\alpha_2\beta_1 + \alpha_1}{2(\beta_1\beta_2 - 1)} - \frac{w_2}{2} \right) \left( \alpha_2 - \beta_2 \left[ \frac{\alpha_2\beta_1 + \alpha_1}{2(\beta_1\beta_2 - 1)} + \frac{w_2}{2} \right] + \frac{\alpha_1\beta_2 + \alpha_2}{2(\beta_1\beta_2 - 1)} + \frac{w_1}{2} \right)
\end{aligned}$$

We check the first order derivatives of  $\Pi_{R,n}^*(w_1, w_2)$  w.r.t. to  $w_1$ :  $\frac{\partial \Pi_{R,n}^*(w_1, w_2)}{\partial w_1} = -(\alpha_1 - \beta_1 w_1 + w_2) < 0$ , as  $\alpha_1 - \beta_1 w_1 + w_2 > 0$  because the market demand is non-negative for product 1 even when the retailer sets the market prices at the wholesale prices  $D_1(p_1 = w_1, p_2 = w_2) > 0$ .

iv) We present the proof when A leads, the proof for the case when B is the Stackelberg leader is identical. From i) and ii) above, we know that  $w_{2,s_A}^e > w_{2,n}^e$  and  $D_{2,s_A}^e > D_{2,n}^e$ , respectively. Therefore,  $(w_{2,s_A}^e - c_2)D_{2,s_A}^e > (w_{2,n}^e - c_2)D_{2,n}^e$  or  $\Pi_{s_A}^{B,e} > \Pi_n^{B,e}$ .

v) Using (3)–(4) and (6)–(7), we obtain the expressions for  $\Pi_{s_A}^{A,e}$  and  $\Pi_n^{A,e}$  as follows:

$$\begin{aligned}\Pi_{s_A}^{A,e} &= \frac{\beta_1 [\alpha_2 + c_1 + \beta_2(2\alpha_1 - 2c_1\beta_1 + c_2)]^2}{2(4\beta_1\beta_2 - 1)^2}, \\ \Pi_n^{A,e} &= \frac{[\alpha_2 + c_1 + \beta_2(2\alpha_1 - 2c_1\beta_1 + c_2)]^2}{16\beta_2(2\beta_1\beta_2 - 1)}.\end{aligned}$$

Therefore, we have

$$\frac{\Pi_n^{A,e}}{\Pi_{s_A}^{A,e}} = \frac{4\beta_1\beta_2(4\beta_1\beta_2 - 2)}{(4\beta_1\beta_2 - 1)^2} = 1 - \frac{1}{(4\beta_1\beta_2 - 1)^2} < 1.$$

Also,  $\beta_1\beta_2 \geq 1 \implies (4\beta_1\beta_2 - 1)^2 \geq 9$  and  $\frac{\Pi_n^{A,e}}{\Pi_{s_A}^{A,e}} = 1 - \frac{1}{(4\beta_1\beta_2 - 1)^2} \geq \frac{8}{9}$ . □

**Proof for Proposition 2:** From the expressions for the emergency order's wholesale price and the equilibrium retail prices, it is easy to see that all the prices are linearly decreasing in  $\delta$ . However, the level of disruption is decreasing in  $\delta$ . Therefore, the equilibrium prices are increasing in the level of disruption. □

**Proof for Lemma 4:** From (12) and (15), we can explore  $w_{E,s_A}^e - w_{E,n}^e$ :

$$\begin{aligned}w_{E,s_A}^e - w_{E,n}^e &= \frac{1}{\beta_1\beta_2 - 1} [\delta(q_{1,n}^e - q_{1,s_A}^e) + \beta_1(q_{2,n}^e - q_{2,s_A}^e)], \\ \text{Using } (q_{1,n}^e - q_{1,s_A}^e) &= \frac{2\beta_1\beta_2 - 1}{4\beta_2} (w_{1,s_A}^e - w_{1,n}^e) \text{ and } (q_{2,n}^e - q_{2,s_A}^e) = -\frac{1}{4} (w_{1,s_A}^e - w_{1,n}^e), \text{ we have} \\ &= \frac{(w_{1,s_A}^e - w_{1,n}^e)}{4(\beta_1\beta_2 - 1)} \left[ \delta \left( \frac{2\beta_1\beta_2 - 1}{\beta_2} \right) - \beta_1 \right] = \frac{(w_{1,s_A}^e - w_{1,n}^e)(2\beta_1\beta_2 - 1)}{4\beta_2(\beta_1\beta_2 - 1)} \left[ \delta - \frac{\beta_1\beta_2}{2\beta_1\beta_2 - 1} \right].\end{aligned}$$

Therefore, if  $\delta > \frac{\beta_1\beta_2}{2\beta_1\beta_2 - 1}$  then  $w_{E,s_A}^e > w_{E,n}^e$ .

When B leads, we investigate  $w_{E,s_B}^e - w_{E,n}^e$  similar to the above case when A leads, we will have:

$$\begin{aligned}w_{E,s_B}^e - w_{E,n}^e &= \frac{1}{\beta_1\beta_2 - 1} [\delta(q_{1,n}^e - q_{1,s_B}^e) + \beta_1(q_{2,n}^e - q_{2,s_B}^e)], \\ \text{Using } (q_{1,n}^e - q_{1,s_B}^e) &= -\frac{1}{4} (w_{2,s_B}^e - w_{2,n}^e) \text{ and } (q_{2,n}^e - q_{2,s_B}^e) = \frac{2\beta_1\beta_2 - 1}{4\beta_1} (w_{2,s_B}^e - w_{2,n}^e), \text{ we have} \\ &= \frac{(w_{2,s_B}^e - w_{2,n}^e)}{4(\beta_1\beta_2 - 1)} [2\beta_1\beta_2 - 1 - \delta].\end{aligned}$$

Therefore, if  $\delta < 2\beta_1\beta_2 - 1$ , then  $w_{E,s_B}^e > w_{E,n}^e$ . Note that  $\beta_i > 1$ , therefore  $2\beta_1\beta_2 - 1 - \delta > 0$ . Thus, the inequality is always satisfied. □

**Proof for Lemma 5:** It is immediate from (15) and (18) that  $w_E^e > w_{E,s_A}^e$ . Consider  $w_E^e - w_{E,s_B}^e = \frac{1}{\beta_1\beta_2} [\delta(q_{1,s_B}^e - q_{1,s_A}^e) + \beta_1q_{2,s_B}^e] > 0$ , as  $q_{1,s_B}^e > q_{1,s_A}^e$ . From Lemma 4, we know that  $w_{E,s_B}^e > w_{E,n}^e$ , therefore  $w_E^e > w_{E,s_B}^e > w_{E,n}^e$ . □

**Proof for Lemma 6: i)**

$$\begin{aligned} p_{1,s_A}^{\delta,e} - p_{1,n}^{\delta,e} &= \frac{\delta(q_{1,n}^e - q_{1,s_A}^e) + \beta_1(q_{2,n}^e - q_{2,s_A}^e)}{2\beta_1(\beta_1\beta_2 - 1)} + \frac{\delta(q_{1,n}^e - q_{1,s_A}^e)}{\beta_1}, \\ \implies 2\beta_1(2\beta_1\beta_2 - 1)(p_{1,s_A}^{\delta,e} - p_{1,n}^{\delta,e}) &= (2\beta_1\beta_2 - 1)\delta(q_{1,n}^e - q_{1,s_A}^e) + \beta_1(q_{2,n}^e - q_{2,s_A}^e), \\ \text{Using } (q_{1,n}^e - q_{1,s_A}^e) &= \frac{2\beta_1\beta_2 - 1}{4\beta_2} (w_{1,s_A}^e - w_{1,n}^e) \end{aligned}$$

$$\begin{aligned} \text{and } (q_{2,n}^e - q_{2,s_A}^e) &= -\frac{w_{1,s_A}^e - w_{1,n}^e}{4} \text{ and } (q_{2,n}^e - q_{2,s_A}^e), \\ \implies 8\beta_1\beta_2(2\beta_1\beta_2 - 1)(p_{1,s_A}^{\delta,e} - p_{1,n}^{\delta,e}) &= (w_{1,s_A}^e - w_{1,n}^e) [\delta(2\beta_1\beta_2 - 1)^2 - 4\beta_1\beta_2]. \end{aligned}$$

Therefore, if  $\delta > \frac{4\beta_1\beta_2}{(2\beta_1\beta_2 - 1)^2}$ , then  $p_{1,s_A}^{\delta,e} > p_{1,n}^{\delta,e}$ , else  $p_{1,s_A}^{\delta,e} < p_{1,n}^{\delta,e}$ .  $\square$

ii) Firstly, we consider  $p_{1,s_B}^{\delta,e} - p_{1,n}^{\delta,e}$ :

$$\begin{aligned} p_{1,s_B}^{\delta,e} - p_{1,n}^{\delta,e} &= \frac{\delta(q_{1,n}^e - q_{1,s_B}^e) + \beta_1(q_{2,n}^e - q_{2,s_B}^e)}{2\beta_1(\beta_1\beta_2 - 1)} + \frac{\delta(q_{1,n}^e - q_{1,s_B}^e)}{\beta_1}, \\ \implies 2\beta_1(2\beta_1\beta_2 - 1)(p_{1,s_B}^{\delta,e} - p_{1,n}^{\delta,e}) &= (2\beta_1\beta_2 - 1)\delta(q_{1,n}^e - q_{1,s_B}^e) + \beta_1(q_{2,n}^e - q_{2,s_B}^e), \\ \text{Using } (q_{1,n}^e - q_{1,s_B}^e) &= -\frac{1}{4} (w_{2,s_B}^e - w_{2,n}^e) \\ \text{and } (q_{2,n}^e - q_{2,s_B}^e) &= \frac{2\beta_1\beta_2 - 1}{4\beta_1} (w_{2,s_B}^e - w_{2,n}^e), \text{ we have:} \\ \implies 2\beta_1(2\beta_1\beta_2 - 1)(p_{1,s_B}^{\delta,e} - p_{1,n}^{\delta,e}) &= (w_{2,s_B}^e - w_{2,n}^e) \left[ -\frac{(2\beta_1\beta_2 - 1)\delta}{4} + 2\beta_1\beta_2 - 1 \right], \\ 2\beta_1(p_{1,s_B}^{\delta,e} - p_{1,n}^{\delta,e}) &= (w_{2,s_B}^e - w_{2,n}^e) \left[ 1 - \frac{\delta}{4} \right] > 0. \end{aligned}$$

Now, we consider  $p_1^{\delta,e} - p_{1,s_B}^{\delta,e}$

$$p_1^{\delta,e} - p_{1,s_B}^{\delta,e} = \frac{\delta(q_{1,s_B}^e - q_{1,s_A}^e) + \beta_1(q_{2,s_B}^e)}{2\beta_1(\beta_1\beta_2 - 1)} + \frac{\delta q_{1,s_B}^e}{\beta_1} > 0, \text{ as } q_{1,s_B}^e > q_{1,s_A}^e.$$

Combining the above two inequalities, we have  $p_1^{\delta,e} > p_{1,s_B}^{\delta,e} > p_{1,n}^{\delta,e}$ .  $\square$

iii) From (11), we see that  $p_2^*(w_E) = \frac{\alpha_1 + \alpha_2\beta_1}{2(\beta_1\beta_2 - 1)} + \frac{w_E}{2}$ . Therefore, from Lemma 4 and Lemma 5, we immediately have the above relationship.  $\square$

**Proof for Proposition 3:**  $D_{2,s_A}^{\delta,e} - D_{2,n}^{\delta,e} = \beta_2(p_{2,n}^{\delta,e} - p_{2,s_A}^{\delta,e}) + (p_{1,s_A}^{\delta,e} - p_{1,n}^{\delta,e})$ . Consider:

$$\begin{aligned} D_{2,s_A}^{\delta,e} - D_{2,n}^{\delta,e} &= \beta_2(p_{2,n}^{\delta,e} - p_{2,s_A}^{\delta,e}) + (p_{1,s_A}^{\delta,e} - p_{1,n}^{\delta,e}), \\ &= \frac{\beta_2}{2}(w_{E,n}^{\delta,e} - w_{E,s_A}^{\delta,e}) + \frac{1}{2\beta_1} \left( (w_{E,s_A}^{\delta,e} - w_{E,n}^{\delta,e}) - 2\delta(q_{1,s_A}^{\delta,e} - q_{1,n}^{\delta,e}) \right), \\ &= \frac{\beta_1\beta_2 - 1}{2\beta_1}(w_{E,n}^{\delta,e} - w_{E,s_A}^{\delta,e}) + \frac{\delta}{\beta_1} (q_{1,n}^{\delta,e} - q_{1,s_A}^{\delta,e}), \end{aligned}$$

$$\text{Using } w_{E,n}^{\delta,e} - w_{E,s_A}^{\delta,e} = -\frac{(w_{1,s_A}^e - w_{1,n}^e)(2\beta_1\beta_2 - 1)}{4\beta_2(\beta_1\beta_2 - 1)} \left[ \delta - \frac{\beta_1\beta_2}{2\beta_1\beta_2 - 1} \right], \text{ and } q_{1,n}^{\delta,e} - q_{1,s_A}^{\delta,e} = \frac{2\beta_1\beta_2 - 1}{4\beta_2} (w_{1,s_A}^e - w_{1,n}^e),$$

we have:

$$\begin{aligned}
D_{2,s_A}^{\delta,e} - D_{2,n}^{\delta,e} &= -\frac{\beta_1\beta_2 - 1}{2\beta_1} \frac{(w_{1,s_A}^e - w_{1,n}^e)(2\beta_1\beta_2 - 1)}{4\beta_2(\beta_1\beta_2 - 1)} \left[ \delta - \frac{\beta_1\beta_2}{2\beta_1\beta_2 - 1} \right] + \frac{\delta}{\beta_1} \frac{2\beta_1\beta_2 - 1}{4\beta_2} (w_{1,s_A}^e - w_{1,n}^e), \\
&= \frac{(w_{1,s_A}^e - w_{1,n}^e)(2\beta_1\beta_2 - 1)}{8\beta_1\beta_2} \left\{ -\left[ \delta - \frac{\beta_1\beta_2}{2\beta_1\beta_2 - 1} \right] + 2\delta \right\}, \\
&= \frac{(w_{1,s_A}^e - w_{1,n}^e)(2\beta_1\beta_2 - 1)}{8\beta_1\beta_2} \left\{ \delta + \frac{\beta_1\beta_2}{2\beta_1\beta_2 - 1} \right\} > 0.
\end{aligned}$$

Similar to the above derivation, we have:  $D_2^{\delta,e} - D_{2,n}^{\delta,e} = \frac{\beta_1\beta_2 - 1}{2\beta_1}(w_{E,n}^{\delta,e} - w_E^{\delta,e}) + \frac{\delta}{\beta_1}(q_{1,n}^{\delta,e} - q_{1,s_A}^{\delta,e})$ ,  $w_{E,n}^{\delta,e} - w_E^{\delta,e} = \frac{1}{\beta_1\beta_2 - 1}(\delta(q_{1,n}^e - q_{1,s_A}^e) - \beta_1 q_{2,n}^e)$ , and  $q_{1,n}^{\delta,e} - q_{1,s_A}^{\delta,e} = \frac{2\beta_1\beta_2 - 1}{4\beta_2}(w_{1,s_A}^e - w_{1,n}^e)$ . Thus, we have

$$\begin{aligned}
D_2^{\delta,e} - D_{2,n}^{\delta,e} &= \frac{1}{2\beta_1}(\delta(q_{1,s_A}^e - q_{1,n}^e) - \beta_1 q_{2,n}^e) + \frac{\delta}{\beta_1}(q_{1,n}^{\delta,e} - q_{1,s_A}^{\delta,e}), \\
&= \frac{1}{2\beta_1}(\delta(q_{1,n}^e - q_{1,s_A}^e) - \beta_1 q_{2,n}^e). \tag{A1}
\end{aligned}$$

RHS of (A1) increases in  $\delta$  as  $q_{1,n}^e > q_{1,s_A}^e$ . At  $\delta = 0$ , RHS of (A1) is negative. Also, if  $q_{2,n}^e \geq q_{1,n}^e$  RHS of (A1) is again negative and for the special case when the products are symmetric, i.e.,  $\alpha_1 = \alpha_2$  and  $\beta_1 = \beta_2$ , RHS of (A1) is again negative. For a relatively low order quantity  $q_{2,n}^e$  (due to the small market size  $\alpha_2$  and/or high values of elasticity for product  $\beta_2$ ), we can have a positive RHS of (A1). This is illustrated in Figure 9.

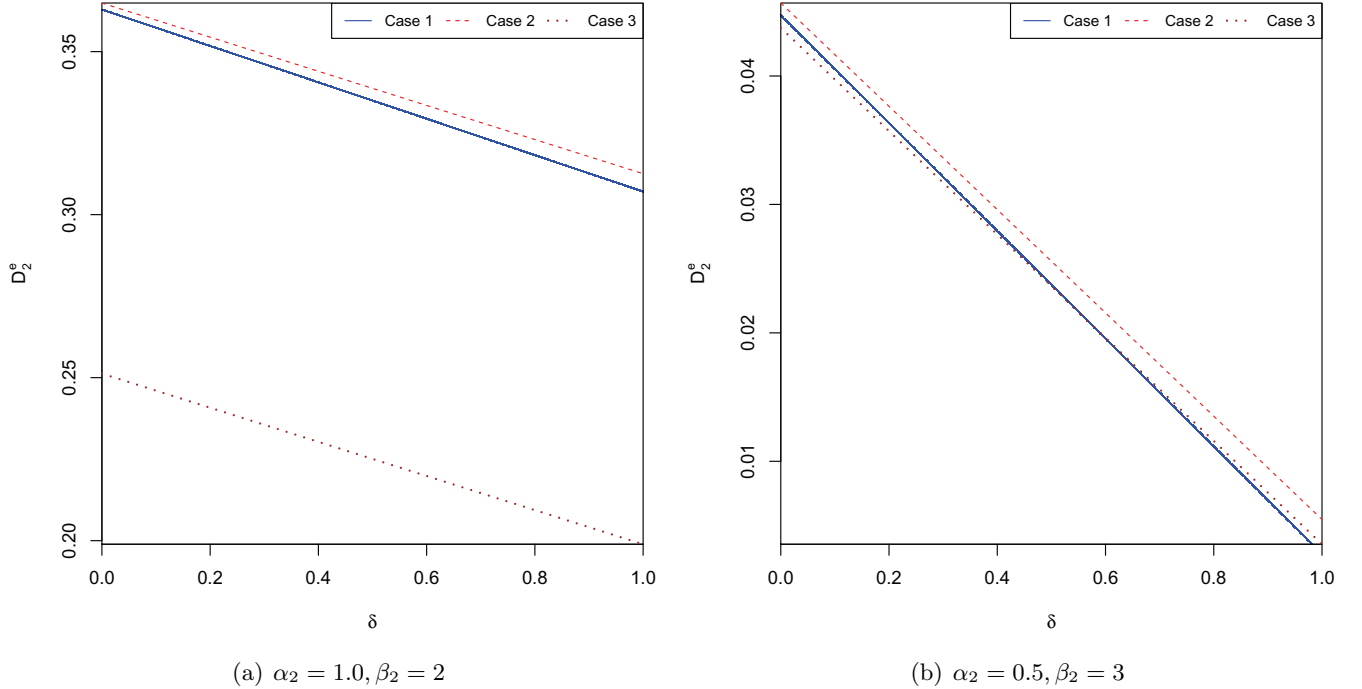

Figure 9: Variation of product 2 demand with  $\delta$  for different values of market potential  $\alpha_2$  and product 2 price elasticity  $\beta_2$ .

Also,  $D_{2,s_A}^{\delta,e} - D_2^{\delta,e} = \frac{\beta_1\beta_2 - 1}{2\beta_1}(w_E^{\delta,e} - w_{E,s_A}^{\delta,e}) > 0$  as  $w_E^{\delta,e} > w_{E,s_A}^{\delta,e}$  from Lemma 4.

Next, consider  $D_{2,s_A}^{\delta,e} - D_{2,s_B}^{\delta,e} = \frac{\beta_1\beta_2 - 1}{2\beta_1}(w_{E,s_B}^{\delta,e} - w_{E,s_A}^{\delta,e}) + \frac{\delta}{\beta_1}(q_{1,s_B}^e - q_{1,s_A}^e) > 0$ , as  $w_{E,s_B}^{\delta,e} > w_{E,s_A}^{\delta,e}$  from Lemma 4, and  $q_{1,s_B}^e > q_{1,s_A}^e$  from Theorem 1.ii), respectively. Similarly, we have  $D_{2,n}^{\delta,e} - D_{2,s_B}^{\delta,e} > 0$ . Therefore, we have  $D_{2,s_A}^{\delta,e} > D_{2,n}^{\delta,e} > D_{2,s_B}^{\delta,e}$ .

From Lemma 5 and Corollary 1, the RHS in the above equality is positive if  $\delta \in \left[0, \frac{\beta_1\beta_2}{2\beta_1\beta_2 - 1}\right)$ . Therefore,  $D_{2,s_A}^{\delta,e} > D_{2,n}^{\delta,e}$  if  $\delta \in \left[0, \frac{\beta_1\beta_2}{2\beta_1\beta_2 - 1}\right)$ . Similarly, from Lemma 5 and Corollary 1, we obtain  $D_2^{\delta,e} < D_{2,s_B}^{\delta,e} < D_{2,n}^{\delta,e}$ .  $\square$
